# Supplementary material for: Multicenter Phase I Trial of the Mitogen-Activated Protein Kinase 1/2 Inhibitor BAY 86-9766 in Patients with Advanced Cancer
Source: Oxford University Press journal article supplement (doi:10.1158/1078-0432.ccr-12-3529), 2013-02-23
Supplement: 10780432ccr123529-sup-104826_0_supp_0_mf1dg3.docx [file 10780432ccr123529-sup-104826_0_supp_0_mf1dg3.docx]

**Figure S1.** Treatment schema
